# Supplementary material for: Rethinking Blood Testing in Pediatric Cancer Patients: A Quality Improvement Approach
Source: PubMed Central journal article supplement — Pediatr Qual Saf. 2022 Jun 14;7(3):e552. doi: 10.1097/pq9.0000000000000552 (PMC9197359; doi:10.1097/pq9.0000000000000552), 2022-06-14
Supplement: pqs-7-e552-s001.pdf [file pqs-7-e552-s001.pdf]

Table S1: Four pathology sets, EUC: Electrolyte, urea, creatinine; LFTs: liver function tests

| Acronym | Specimen                       | Description                                                                                                     | Discrete result                                                                                                                                                                                                                                                                                                                       |
|---------|--------------------------------|-----------------------------------------------------------------------------------------------------------------|---------------------------------------------------------------------------------------------------------------------------------------------------------------------------------------------------------------------------------------------------------------------------------------------------------------------------------------|
| FBC     | Full Blood Count               | Auto and/or manual differential and Blood Film                                                                  | WCC<br>Hb<br>PLT<br>MCV<br>RCC<br>MCH<br>MCHC<br>RDW-SD<br>RDW-CV<br>MPV<br>Blood Film Comment<br>Neutrophils %<br>Neutrophils Absolute<br>Lymphocytes %<br>Lymphocytes Absolute<br>Monocytes %<br>Monocytes Absolute<br>Eosinophils %<br>Eosinophils Absolute<br>Basophils Absolute<br>Basophils %<br>NRBC %<br>Blasts% (if present) |
| EUC     | Electrolytes, Urea, Creatinine | Indicates Electrolytes, Urea, Creatinine and includes eGFR (estimated glomerular filtration rate) calculation   | Sodium<br>Potassium<br>Chloride<br>Urea<br>Creatinine                                                                                                                                                                                                                                                                                 |
| LFT     | Liver Function Tests           | Includes Bilirubin (Total), AST,ALT, ALP, GGT, Total Protein and Albumin.                                       | Bilirubin (Total),<br>AST aspartate aminotransferase<br>ALT alanine aminotransferase<br>ALP alkaline phosphatase<br>GGT Gamma-glutamyl transferase<br>Total Protein<br>Albumin                                                                                                                                                        |
| CMP     | Calcium Magnesium Phosphate    | Indicates CALCIUM, MAGNESIUM and PHOSPHATE. Reported result includes ALBUMIN and CORRECTED CALCIUM calculation. | Calcium<br>Corrected Calcium<br>Magnesium<br>Phosphate                                                                                                                                                                                                                                                                                |
