# Supplementary material for: Rethinking Blood Testing in Pediatric Cancer Patients: A Quality Improvement Approach
Source: PubMed Central journal article supplement — Pediatr Qual Saf. 2022 Jun 14;7(3):e552. doi: 10.1097/pq9.0000000000000552 (PMC9197359; doi:10.1097/pq9.0000000000000552), 2022-06-14
Supplement: pqs-7-e552-s002.pdf [file pqs-7-e552-s002.pdf]

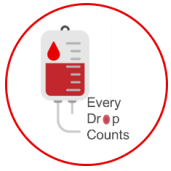

# Sensible Blood Monitoring

Thank you for participating in this survey,

We are always striving to improve the care delivered to our patients. A team of clinicians in **the unit is currently looking into the frequency of pathology testing** for oncology/haematology patients. Your insight into blood sampling will be highly valued within this project and is very important in helping us improve services for children with cancer.

All responses are anonymous and confidential.

If you have any concerns about the survey and would like to speak with someone who is completely independent of this project, please contact the Hospital Quality Officer.

Thank you,

Quality Improvement Team

## Baseline Survey

1. The frequency of taking blood tests for haematology/oncology patients is:
  - a) Too infrequent
  - b) Just Right
  - c) Too Frequent
  - d) Unsure

2. What factors influence your decision to request a pathology test?

3. How frequently do you feel the following blood tests should be taken on a clinically stable patient?

- a) Admitted for chemotherapy (if not specified by the protocol)

- FBC

- EUC

- LFT

- CMP

- b) Admitted for fever

- FBC

- EUC

- LFT

- CMP



# Sensible Blood Monitoring

4. How would you define “clinically appropriate pathology tests”

5. Discipline

- a) Medical
- b) Nursing

6. Years of clinical experience

- < 2
- 2 - 4
- 5 - 9
- > 10

## Follow-up Survey

1. The frequency of taking blood tests for haematology/oncology patients is:

- a) Not enough
- b) Just Right
- c) Too much
- d) Unsure

2. How frequently do you feel the following blood tests should be taken on a clinically stable patient?

a) Admitted for chemotherapy (if not specified by the protocol)

- FBC
- EUC
- LFT
- CMP

  
  
  

b) Admitted for fever

- FBC
- EUC
- LFT
- CMP

  
  
  

3. What factors influence your decision to request a pathology test?

4. Has your practice changed since the implementation of the Sensible Blood Project?

- Yes
- No



# Sensible Blood Monitoring

5. What has influenced this practice change? (select all relevant options)

- Blood test frequency recommendation table
- 'No form / No blood' initiative
- Greater understanding of why tests are taken
- Senior medical practice change
- Support in not ordering a test
- Word of mouth

Other \_\_\_\_\_

6. How would you define "clinically appropriate pathology tests"

7. Discipline

- a) Medical
- b) Nursing

8. Years of clinical experience

- < 2
- 2 - 4
- 5 - 9
- 10 or more
